# Supplementary material for: Hypothalamic remodeling of thyroid hormone signaling during hibernation in the arctic ground squirrel
Source: PubMed Central journal article supplement (PMC9126913; doi:10.1038/s42003-022-03431-8), 2022-05-23
Supplement: 42003_2022_3431_MOESM1_ESM.pdf [file 42003_2022_3431_MOESM1_ESM.pdf]

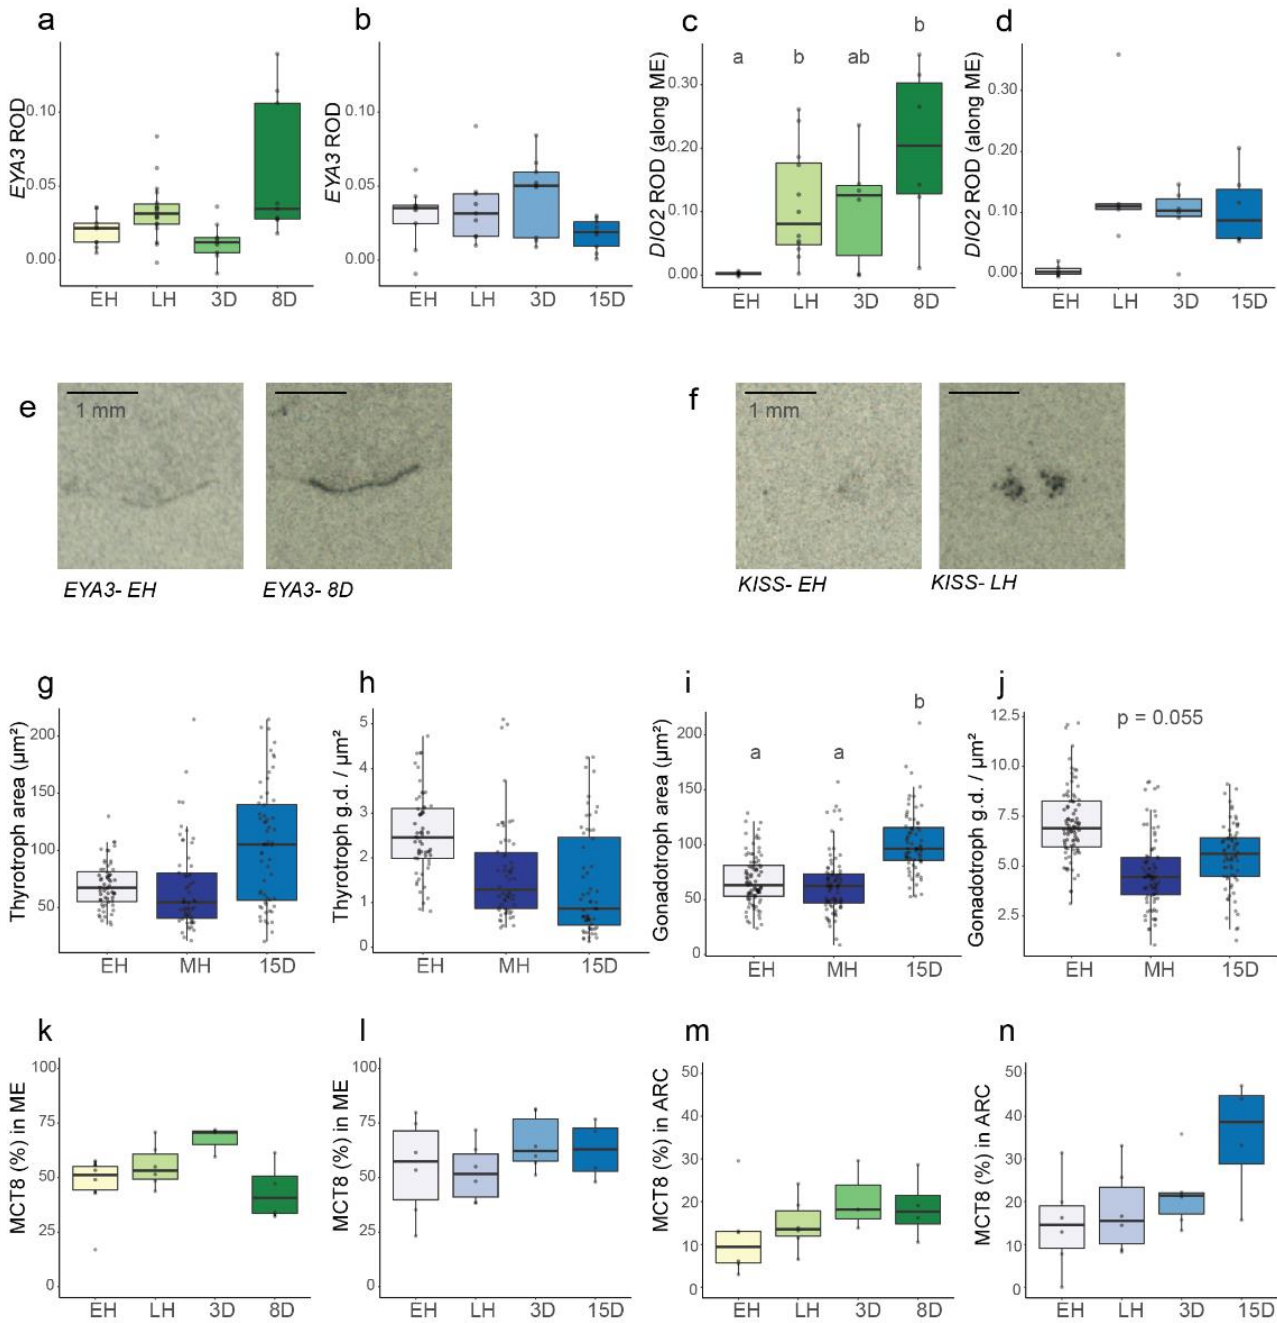

**Fig S1. Additional comparisons for cross-sectional hibernation study in arctic ground squirrels.** *EYA3* mRNA expression in the pars tuberalis of females (a) and males (b) and *DIO2* mRNA expression along the median eminence in females (c) and males (d) as measured by in situ hybridization. Expression of *EYA3* (e) and *KISS* (f) mRNA in female arctic ground squirrels. Photos selected to represent highest expression observed in group and scale bars are 1mm. Changes in the cross-sectional area and granule density (g.d.) of thyrotrophs (g,h) and gonadotrophs (i,j) in male arctic ground squirrels based on electron microscopy imaging. Panels g-j include a mid-hibernation (MH) control group, which is the control group from the mid-hibernation warming study. Changes in staining of MCT8 protein levels visualized by immunohistochemistry in females (k,m) and males (l,n). For all plots, significantly different pairwise comparisons with linear-mixed effects modelling are indicated by lower-case letters ( $p < 0.05$ ). The center line in the box plot represents the median, box boundaries represent the 25<sup>th</sup> and 75<sup>th</sup> percentiles, and error bars represent the 25<sup>th</sup> and 75<sup>th</sup> percentiles  $\pm$  1.5 times the interquartile range and colored shading represents sampling groups. For sample size, see methods. See also Figures 1, 2, 3, and 5.

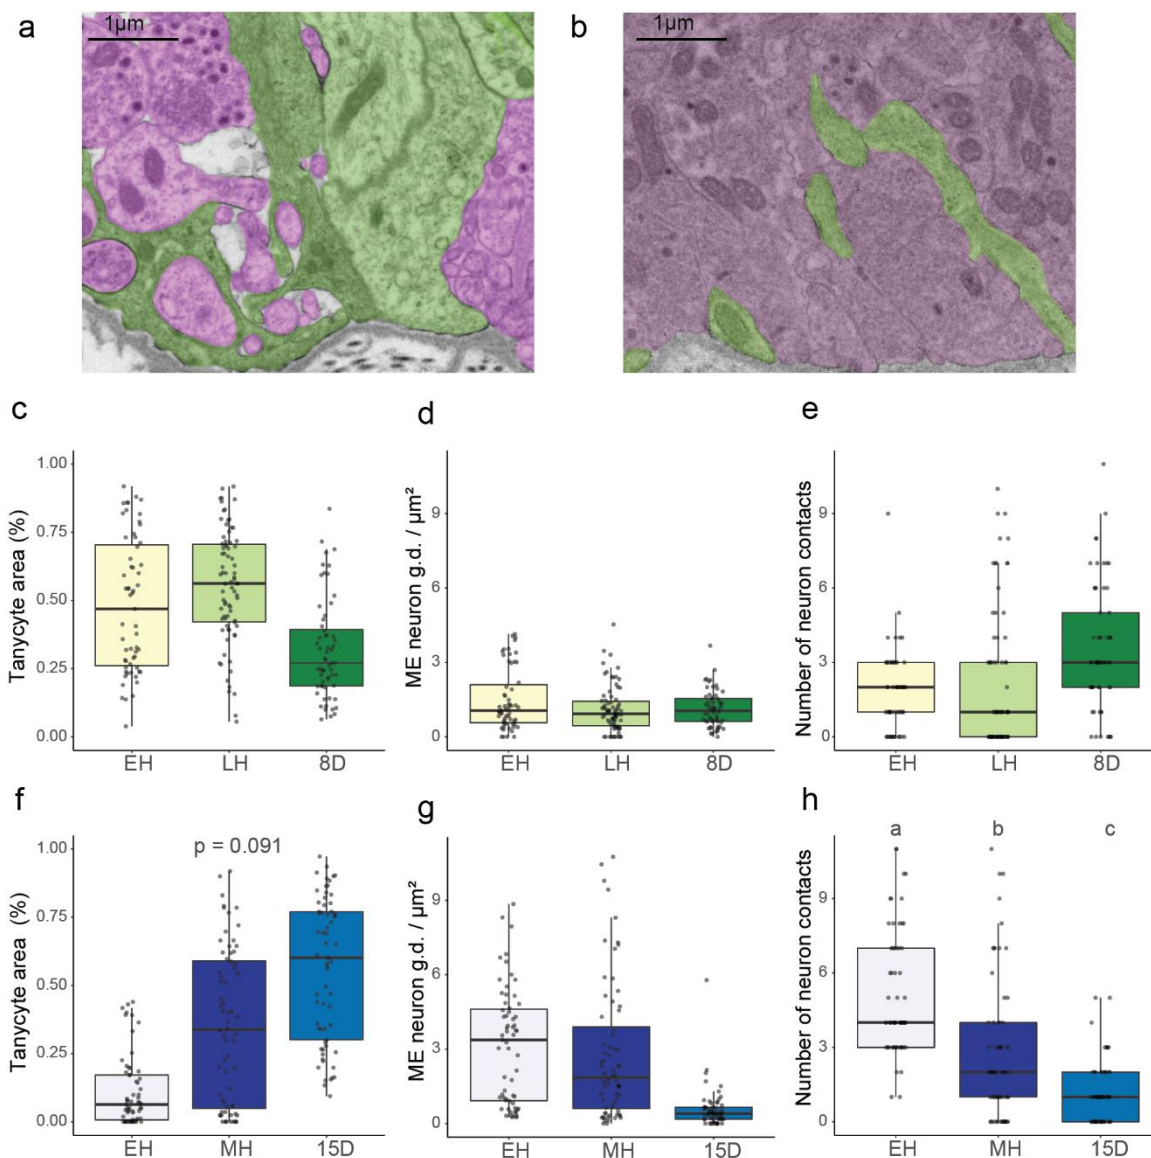

**Fig S2. Sex-differences in tanyctic remodeling during hibernation under constant darkness. Sex-differences in tanyctic remodeling during hibernation under constant darkness.** a and b) Electron microscopy (EM) images of tanycytes (green false shading) illustrating the access of neurons (purple false shading) to the median eminence (image scale H:  $4\mu\text{m}$  x W:  $5\mu\text{m}$ ). In a, tanyctic endfeet enclose neurons preventing access to the median eminence and release of secretory granules. In b, tanyctic endfeet retract, permitting neuron access to the median eminence and granule release. Quantification of the cross-sectional area ( $\mu\text{m}^2$ ) of tanyctic processes at the median eminence (c) secretory granule density (g.d.) in neurons at the median eminence (d), and number of contacts between neurons and the median eminence (e) in EM images in female arctic ground squirrels. Panels f-h show corresponding data in males. Male data include a mid-hibernation (MH) group, which is the control group from mid-hibernation warming study. These animals and tissues were treated identically in the two studies. Significantly different pairwise comparisons with linear-mixed effects modelling are indicated by letters ( $p < 0.05$ ). The center line in the box plot represents the median, box boundaries represent the 25<sup>th</sup> and 75<sup>th</sup> percentiles, and error bars represent the 25<sup>th</sup> and 75<sup>th</sup> percentiles  $\pm 1.5$  times the interquartile range. For sample size, see methods.

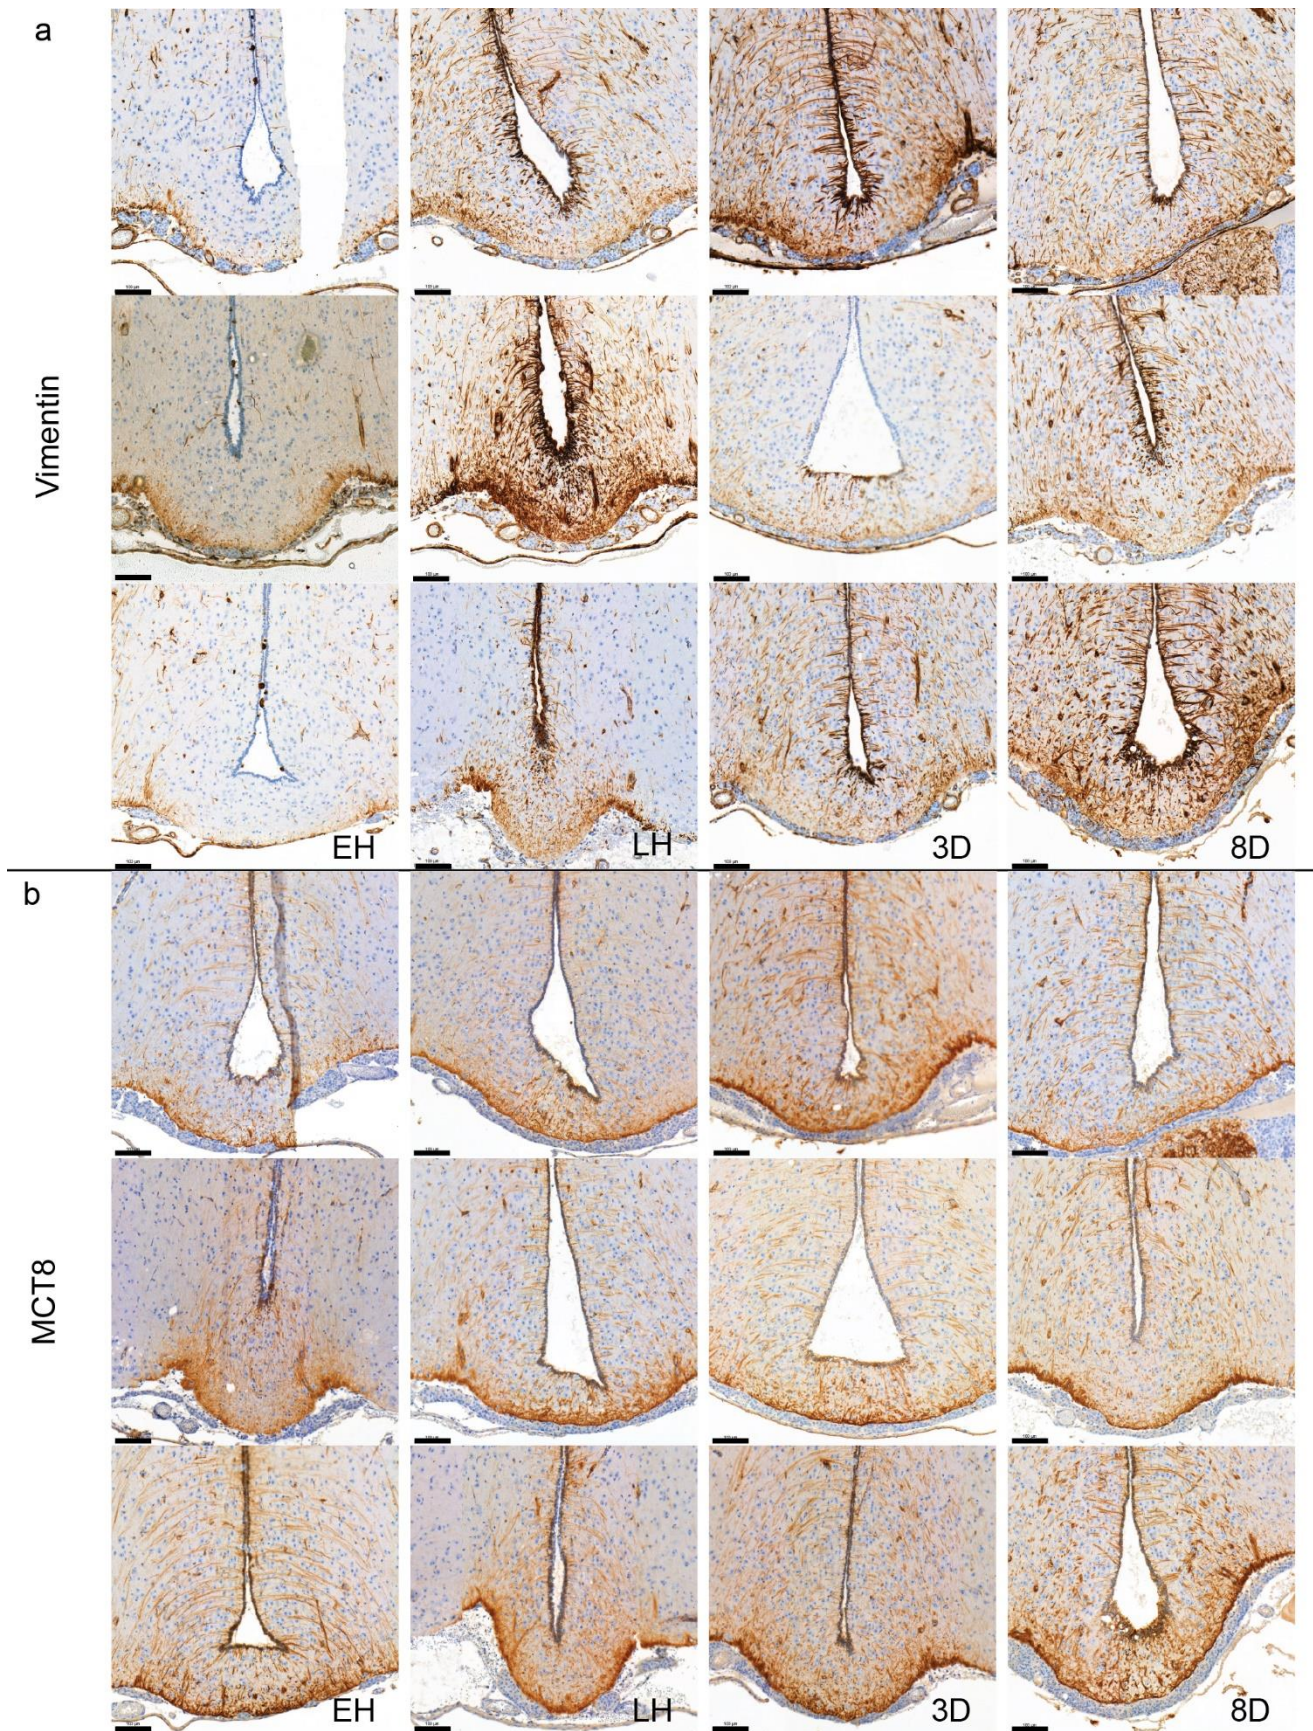

**Fig S3. Vimentin and MCT8 immunohistochemistry in female arctic ground squirrels.** a) DAB immunohistochemistry for vimentin and b) MCT8 in all female arctic ground squirrels. Columns represent the timepoint of sampling with each image representing a unique individual. Scale bars are 100 μm. See also Figure 3.

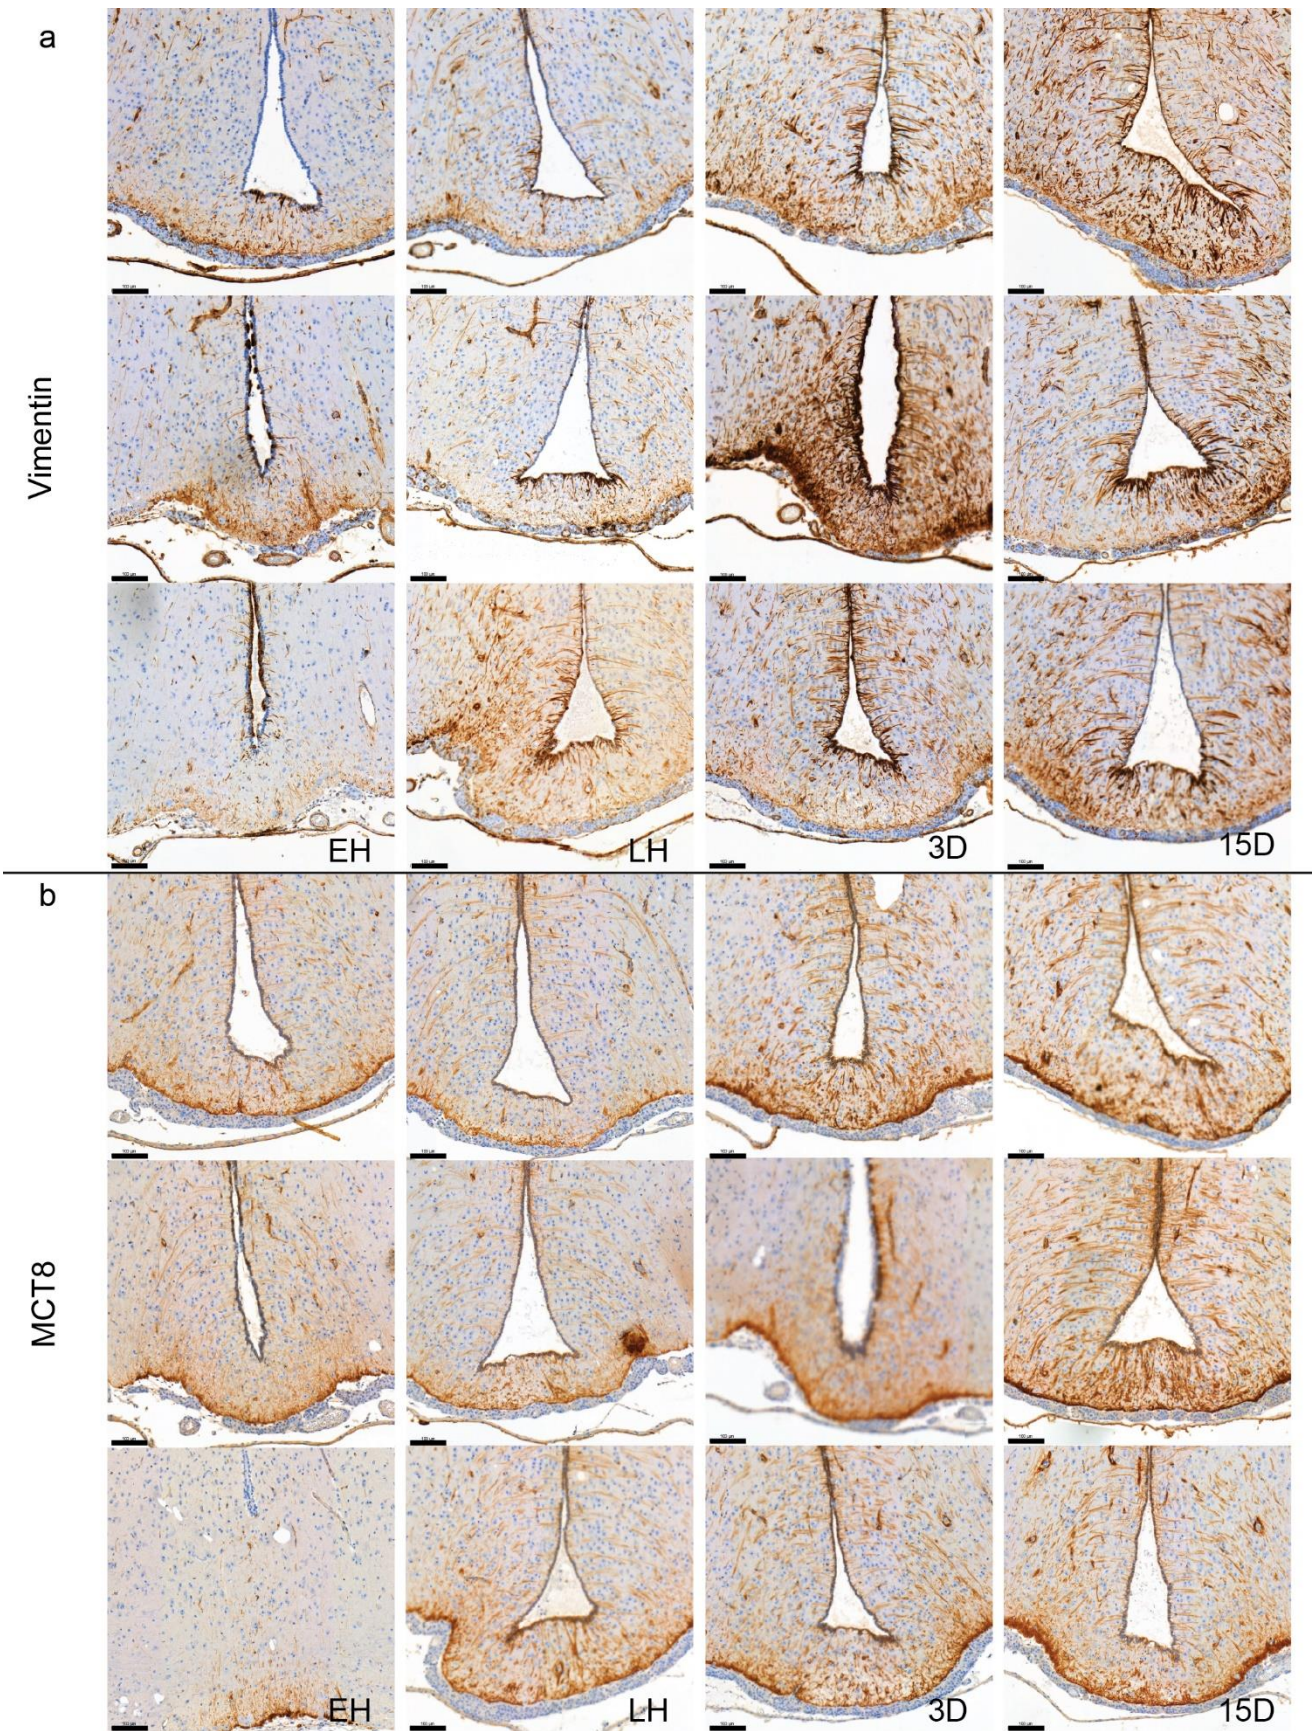

**Fig S4. Vimentin and MCT8 immunohistochemistry in male arctic ground squirrels.** a) DAB immunohistochemistry for vimentin and b) MCT8 in all male arctic ground squirrels. Columns represent the timepoint of sampling with each image representing a unique individual. Scale bars are 100  $\mu$ m. See also Figure 3.

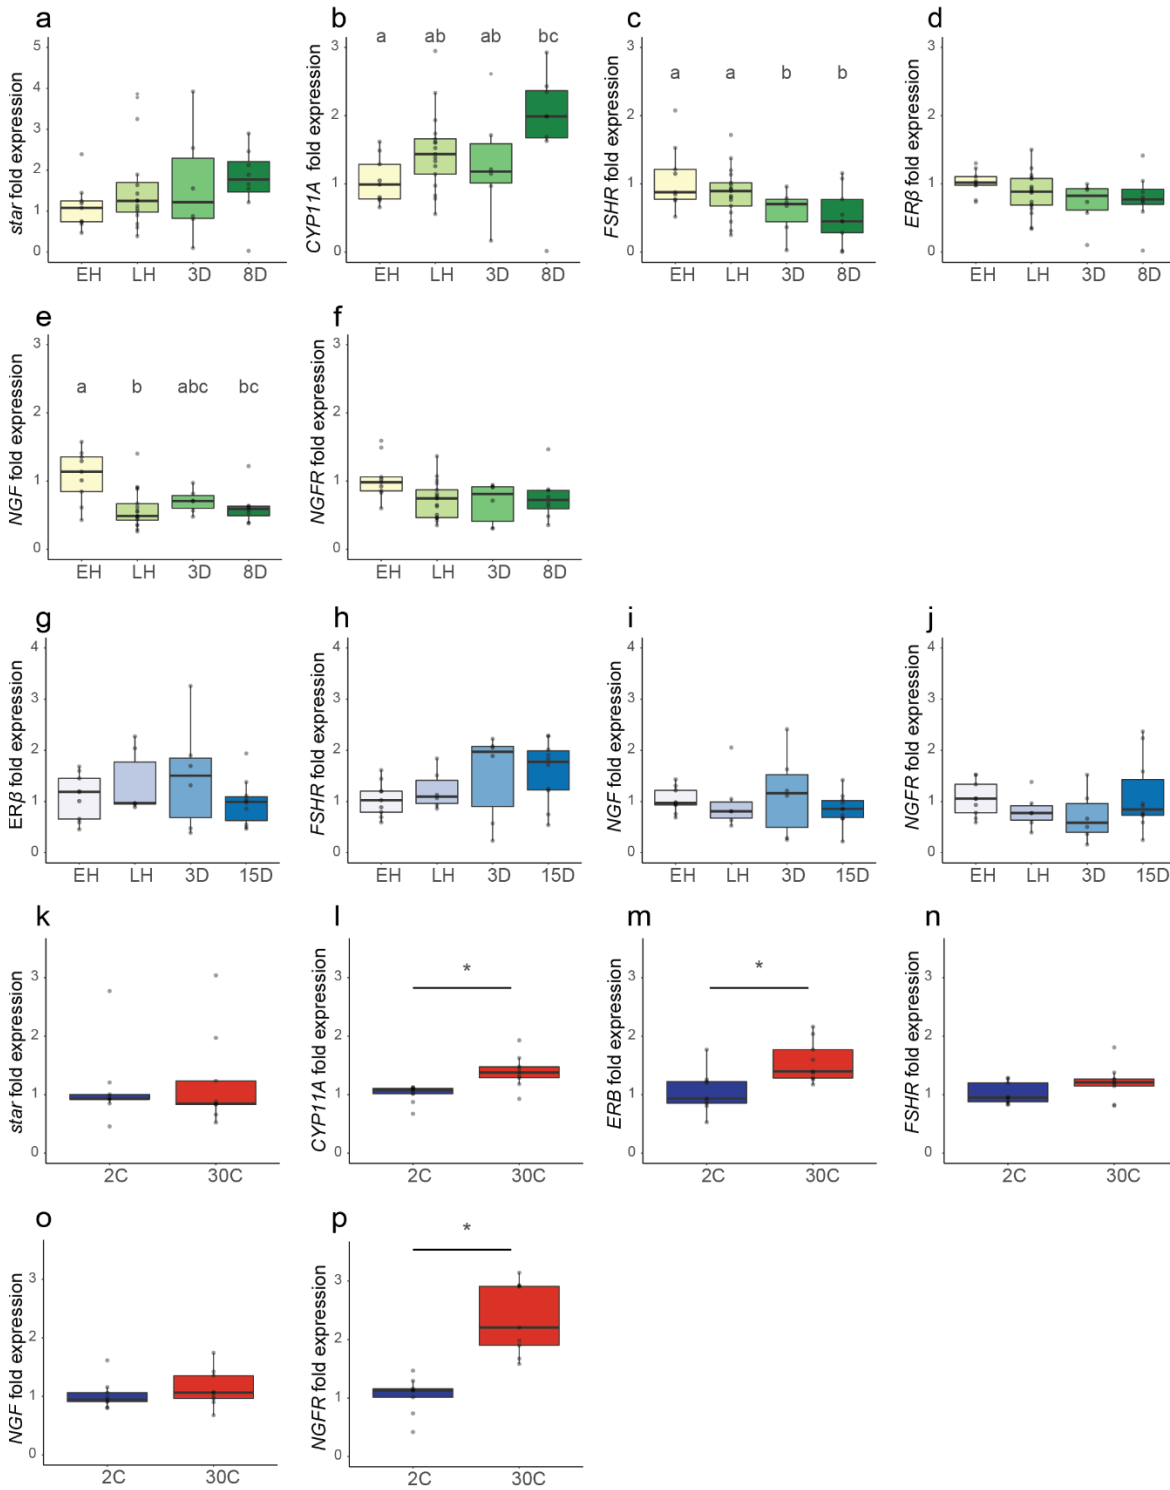

**Fig S5. Quantitative PCR of ovaries and testes.** Panels a-f show fold changes in steroidogenic gene expression in ovaries collected from female arctic ground squirrels across hibernation relative to the EH (early hibernation) group. Panels g-j show fold changes in steroidogenic gene expression in testes from male arctic ground squirrels across hibernation relative to the EH group. Panels k-p show fold changes in steroidogenic gene expression in testes in control (2°C) and artificially warmed (30°C) groups relative to the control group. Significantly different pairwise comparisons with linear-mixed effects modelling are indicated by lower-case letters ( $p < 0.05$ ) for panels a-j and stars for panels k-p. The center line in the box plot represents the median, box boundaries represent the 25<sup>th</sup> and 75<sup>th</sup> percentiles, and error bars represent the 25<sup>th</sup> and 75<sup>th</sup> percentiles  $\pm$  1.5 times the interquartile range. For sample size, see methods. See also Figures 4, 5, and 6.

**Table S1:** Omnibus test results for all data collected from female arctic ground squirrels during the cross-sectional hibernation study. The symbol (\*) indicates that the variance attributed to the random effect (RE) was near zero and could not be estimated.

| <b>Model Type: LMM with Gaussian Distribution</b> |            |                       |               |                |              |              |          |             |
|---------------------------------------------------|------------|-----------------------|---------------|----------------|--------------|--------------|----------|-------------|
| <b>Target</b>                                     | <b>RE</b>  | <b>Transformation</b> | <b>Sum.Sq</b> | <b>Mean.Sq</b> | <b>NumDF</b> | <b>DenDF</b> | <b>F</b> | <b>P(F)</b> |
| <i>EYA3</i>                                       | id         | None                  | 0.001         | 0              | 3            | 11           | 1.998    | 0.173       |
| <i>TSHB</i>                                       | id*        | Ordered normal        | 24.737        | 8.246          | 3            | 11           | 17.783   | 0           |
| <i>DIO2- 3V</i>                                   | id         | Ordered normal        | 2.687         | 0.896          | 3            | 11           | 4.944    | 0.021       |
| <i>DIO2- along ME</i>                             | id         | Ordered normal        | 7.618         | 2.539          | 3            | 11           | 4.977    | 0.02        |
| <i>DIO3</i>                                       | id *       | Ordered normal        | 14.467        | 4.822          | 3            | 11           | 8.773    | 0.003       |
| <i>KISS</i>                                       | id         | Ordered normal        | 11.109        | 3.703          | 3            | 11           | 6.168    | 0.01        |
| <i>NES</i>                                        | id         | Ordered normal        | 7.364         | 2.455          | 3            | 11           | 9.54     | 0.002       |
| Thyrotroph cell area                              | id         | Ordered normal        | 4.541         | 2.27           | 2            | 7            | 3.21     | 0.103       |
| Thyrotroph granule density                        | id         | Ordered normal        | 4.354         | 2.177          | 2            | 7            | 6.05     | 0.03        |
| Tanycytes- ME percent Area                        | id         | Ordered normal        | 1.687         | 0.843          | 2            | 6.998        | 1.673    | 0.255       |
| ME neuron granule density                         | id         | Ordered normal        | 0.102         | 0.051          | 2            | 6.999        | 0.103    | 0.903       |
| Vimentin (ARC)                                    | id         | None                  | 515.722       | 171.907        | 3            | 7.49         | 5.881    | 0.022       |
| Vimentin (ME)                                     | id         | Ordered normal        | 4.291         | 1.43           | 3            | 7.761        | 5.332    | 0.027       |
| MCT8 (ARC)                                        | id         | None                  | 187.403       | 62.468         | 3            | 6.637        | 0.997    | 0.451       |
| MCT8 (ME)                                         | id         | None                  | 506.292       | 168.764        | 3            | 6.974        | 1.826    | 0.231       |
| Gonadotroph cell area                             | id         | Arc sin               | 15.353        | 7.677          | 2            | 6.959        | 10.474   | 0.008       |
| Gonadotroph granule density                       | id         | none                  | 50.213        | 25.107         | 2            | 6.751        | 35.502   | 0           |
| Antral follicle diameter                          | id/section | Ordered normal        | 259114.1      | 86371.35       | 3            | 35.925       | 6.05     | 0.002       |
| <b>Model Type: LMM with Poisson Distribution</b>  |            |                       |               |                |              |              |          |             |
| <b>Target</b>                                     | <b>RE</b>  | <b>Transformation</b> | <b>Chisq</b>  | <b>df</b>      | <b>P(PB)</b> |              |          |             |
| Number of antral follicles                        | id/section | None                  | 7.120         | 3              | 0.073        |              |          |             |

|                                         |           |                       |                                |           |                |  |  |  |
|-----------------------------------------|-----------|-----------------------|--------------------------------|-----------|----------------|--|--|--|
| Number of ME neuron contacts            | id        | None                  | 3.151                          | 2         | 0.328          |  |  |  |
| <b>Model Type: Kruskal- Wallis Test</b> |           |                       |                                |           |                |  |  |  |
| <b>Target</b>                           | <b>RE</b> | <b>Transformation</b> | <b>Kruskall-Wallis Chi-Sq.</b> | <b>df</b> | <b>p-value</b> |  |  |  |
| <i>STAR</i> fold expression             | None      | None                  | 3.363                          | 3         | 0.339          |  |  |  |
| <i>CYP11A</i> fold expression           | None      | None                  | 9.005                          | 3         | 0.029          |  |  |  |
| <i>ERβ</i> fold expression              | None      | None                  | 5.108                          | 3         | 0.164          |  |  |  |
| <i>FSHR</i> fold expression             | None      | None                  | 7.946                          | 3         | 0.047          |  |  |  |
| <i>NGF</i> fold expression              | None      | None                  | 10.377                         | 3         | 0.016          |  |  |  |
| <i>NGFR</i> fold expression             | None      | None                  | 6.834                          | 3         | 0.077          |  |  |  |
| Ovarian mass                            | None      | None                  | 12.120                         | 3         | 0.007          |  |  |  |
| Progesterone                            | None      | None                  | 9.677                          | 3         | 0.022          |  |  |  |
| Estradiol                               | None      | None                  | 4.020                          | 3         | 0.259          |  |  |  |

**Table S2:** Omnibus test results for all data collected from male arctic ground squirrels during the cross-sectional hibernation study. The symbol (\*) indicates that the variance attributed to random effect (RE) was near zero and could not be estimated. The symbol (&) denotes electron microscopy analyses for which the control group from the mid-hibernation warming study was also included in analyses.

| Target                          | RE              | Transformation | Sum.Sq  | Mean.Sq | NumDF | DenDF | F     | P(F)  |
|---------------------------------|-----------------|----------------|---------|---------|-------|-------|-------|-------|
| <i>EYA3</i>                     | id and position | None           | 0.001   | 0       | 3     | 8     | 0.99  | 0.445 |
| <i>TSHB</i>                     | id and position | None           | 0.001   | 0       | 3     | 8     | 2.179 | 0.168 |
| <i>DIO2- 3V</i>                 | id and position | None           | 0.009   | 0.003   | 3     | 8.001 | 2.717 | 0.115 |
| <i>DIO2- along ME</i>           | id              | Square root    | 3.336   | 1.112   | 3     | 7.967 | 5.164 | 0.028 |
| <i>DIO3</i>                     | id and position | Ordered normal | 3.2     | 1.067   | 3     | 8     | 1.09  | 0.407 |
| <i>KISS</i>                     | id and position | Ordered normal | 2.383   | 0.794   | 3     | 8     | 3.133 | 0.087 |
| <i>NES</i>                      | id and position | Ordered normal | 2.046   | 0.682   | 3     | 8     | 2.062 | 0.184 |
| Thyrotroph cell area (&)        | id              | Ordered normal | 0.574   | 0.287   | 2     | 6     | 0.686 | 0.539 |
| Thyrotroph granule density (&)  | id              | Ordered normal | 1.509   | 0.754   | 2     | 6     | 1.641 | 0.27  |
| Gonadotroph cell area (&)       | id              | Ordered normal | 6.877   | 3.438   | 2     | 5.997 | 5.876 | 0.039 |
| Gonadotroph granule density (&) | id              | Ordered normal | 5.997   | 2.999   | 2     | 5.997 | 4.894 | 0.055 |
| Tanycytes- ME percent Area (&)  | id              | Ordered normal | 2.314   | 1.157   | 2     | 6     | 3.674 | 0.091 |
| ME neuron granule density (&)   | id              | Ordered normal | 1.514   | 0.757   | 2     | 6     | 2.069 | 0.207 |
| Vimentin (ARC)                  | id              | Arcsin         | 2.23    | 0.743   | 3     | 7.977 | 4.357 | 0.043 |
| Vimentin (ME)                   | id              | Ordered normal | 0.629   | 0.21    | 3     | 7.991 | 1.045 | 0.424 |
| MCT8 (ARC)                      | id              | None           | 828.335 | 276.112 | 3     | 7.937 | 2.865 | 0.104 |
| MCT8 (ARC)                      | id              | Ordered normal | 3.43    | 1.143   | 3     | 7.946 | 1.257 | 0.353 |



|                                                  |            |                       |                                |           |                |        |        |   |
|--------------------------------------------------|------------|-----------------------|--------------------------------|-----------|----------------|--------|--------|---|
| Tubule diameter                                  | id/section | Ordered normal        | 11.276                         | 3.759     | 3              | 26.002 | 20.598 | 0 |
| <b>Model Type: LMM with Poisson Distribution</b> |            |                       |                                |           |                |        |        |   |
| <b>Target</b>                                    | <b>RE</b>  | <b>Transformation</b> | <b>Chisq</b>                   | <b>df</b> | <b>P(PB)</b>   |        |        |   |
| Number of ME neuron contacts (&)                 | id         | None                  | 9.835                          | 2         | 0.035          |        |        |   |
| <b>Model Type: Kruskal- Wallis Test</b>          |            |                       |                                |           |                |        |        |   |
| <b>Target</b>                                    | <b>RE</b>  | <b>Transformation</b> | <b>Kruskall Wallis Chi-Sq.</b> | <b>df</b> | <b>p-value</b> |        |        |   |
| <i>STAR</i> fold expression                      | None       | None                  | 13.811                         | 3         | 0.003          |        |        |   |
| <i>CYP11A</i> fold expression                    | None       | None                  | 17.008                         | 3         | 0.001          |        |        |   |
| <i>ERβ</i> fold expression                       | None       | None                  | 1.145                          | 3         | 0.766          |        |        |   |
| <i>FSHR</i> fold expression                      | None       | None                  | 4.587                          | 3         | 0.205          |        |        |   |
| <i>NGF</i> fold expression                       | None       | None                  | 2.034                          | 3         | 0.565          |        |        |   |
| <i>NGFR</i> fold expression                      | None       | None                  | 3.055                          | 3         | 0.383          |        |        |   |
| Testis mass                                      | None       | None                  | 17.185                         | 3         | 0.001          |        |        |   |
| Testis staging                                   | None       | None                  | 24.024                         | 3         | 0.000          |        |        |   |
| Testosterone                                     | None       | None                  | 9.061                          | 3         | 0.028          |        |        |   |

**Table S3:** Omnibus test results for data collected from male arctic ground squirrels during the mid-hibernation warming experiment. The symbol (\*) indicates that the variance attributed to the random effect (RE) was near zero and could not be estimated.

| Target                       | RE         | Transformation | Sum.Sq | Mean.Sq | NumDF | DenDF | F      | P(F)  |
|------------------------------|------------|----------------|--------|---------|-------|-------|--------|-------|
| <i>EYA3</i>                  | id*        | Ordered normal | 0.391  | 0.391   | 1     | 3.899 | 0.382  | 0.571 |
| <i>TSH<math>\beta</math></i> | id*        | Ordered normal | 0.006  | 0.006   | 1     | 4     | 0.006  | 0.942 |
| <i>DIO2- 3V</i>              | id         | Ordered normal | 4.465  | 4.465   | 1     | 4     | 10.604 | 0.031 |
| <i>DIO2- along ME</i>        | id         | Ordered normal | 0.34   | 0.34    | 1     | 4     | 0.755  | 0.434 |
| <i>DIO3</i>                  | id         | Ordered normal | 0.001  | 0.001   | 1     | 4     | 0.002  | 0.965 |
| <i>KISS</i>                  | id         | Ordered normal | 0.773  | 0.773   | 1     | 4     | 2.117  | 0.219 |
| <i>NES</i>                   | id         | None           | 0      | 0       | 1     | 4     | 0.196  | 0.681 |
| Thyrotroph cell area         | id         | Ordered normal | 0.132  | 0.132   | 1     | 4     | 0.197  | 0.68  |
| Thyrotroph granule density   | id         | Ordered normal | 3.84   | 3.84    | 1     | 4     | 6.394  | 0.065 |
| Tanycytes- ME percent Area   | id         | Ordered normal | 0.065  | 0.065   | 1     | 4     | 0.209  | 0.671 |
| ME neuron granule density    | id         | Ordered normal | 0.518  | 0.518   | 1     | 4     | 1.368  | 0.307 |
| Vimentin (ARC)               | id         | Ordered normal | 0.58   | 0.58    | 1     | 4     | 0.697  | 0.451 |
| Vimentin (ME)                | id         | Ordered normal | 2.014  | 2.014   | 1     | 4     | 3.993  | 0.116 |
| MCT8 (ARC)                   | id         | None           | 54.926 | 54.926  | 1     | 2.949 | 3.207  | 0.173 |
| MCT8 (ARC)                   | id         | None           | 7.493  | 7.493   | 1     | 2.907 | 0.14   | 0.734 |
| Gonadotroph cell area        | id         | Ordered normal | 3.001  | 3.001   | 1     | 3.988 | 3.558  | 0.133 |
| Gonadotroph granule density  | id         | Ordered normal | 27.859 | 27.859  | 1     | 3.929 | 47.002 | 0.003 |
| Tubule diameter              | id/section | Yeo-Johnson    | 0.036  | 0.036   | 1     | 16    | 0.071  | 0.793 |
| Lumen diameter               | id/section | Box-Cox        | 1.065  | 1.065   | 1     | 16    | 1.66   | 0.216 |
|                              |            |                |        |         |       |       |        |       |

*Table continued on next page*

| <b>Model Type: LMM with Poisson Distribution</b> |           |                       |                                |           |                |  |  |  |
|--------------------------------------------------|-----------|-----------------------|--------------------------------|-----------|----------------|--|--|--|
| <b>Target</b>                                    | <b>RE</b> | <b>Transformation</b> | <b>Chisq</b>                   | <b>df</b> |                |  |  |  |
| Number of ME neuron contacts                     | id        | None                  | 0.066                          | 1         | 0.851          |  |  |  |
| <b>Model Type: Kruskal- Wallis Test</b>          |           |                       |                                |           |                |  |  |  |
| <b>Target</b>                                    | <b>RE</b> | <b>Transformation</b> | <b>Kruskall Wallis Chi-Sq.</b> | <b>df</b> | <b>p-value</b> |  |  |  |
| <i>STAR</i> fold expression                      | None      | None                  | 0.563                          | 1         | 0.453          |  |  |  |
| <i>CYP11A</i> fold expression                    | None      | None                  | 8.751                          | 1         | 0.003          |  |  |  |
| <i>ERβ</i> fold expression                       | None      | None                  | 7.253                          | 1         | 0.007          |  |  |  |
| <i>FSHR</i> fold expression                      | None      | None                  | 0.860                          | 1         | 0.354          |  |  |  |
| <i>NGF</i> fold expression                       | None      | None                  | 1.031                          | 1         | 0.310          |  |  |  |
| <i>NGFR</i> fold expression                      | None      | None                  | 12.789                         | 1         | 0.000          |  |  |  |
| Testis mass                                      | None      | None                  | 1.031                          | 1         | 0.310          |  |  |  |
| Testis staging                                   | None      | None                  | NA                             | 1         | NA             |  |  |  |
| Testosterone                                     | None      | None                  | 0.563                          | 1         | 0.453          |  |  |  |

**Table S4:** Sampling of arctic ground squirrels for repeated cross-sectional study.

| <b>Timepoint</b>     | <b>Sampling dates</b> | <b>Days after hibernation entry (mean <math>\pm</math> SD)</b> | <b>Photoperiod during hibernation</b>                                                      |
|----------------------|-----------------------|----------------------------------------------------------------|--------------------------------------------------------------------------------------------|
| <b>MALES</b>         |                       |                                                                |                                                                                            |
| Early hibernation    | 10/6 - 11/20          | 18 $\pm$ 13                                                    | 24D                                                                                        |
| Late hibernation     | 2/27 - 3/15           | 141 $\pm$ 22                                                   | 24D                                                                                        |
| 3d post-hibernation  | 2/27 - 4/6            | 152 $\pm$ 31                                                   | 24D                                                                                        |
| 15d post-hibernation | 3/9 - 4/17            | 138 $\pm$ 36                                                   | 24D                                                                                        |
| <b>FEMALES</b>       |                       |                                                                |                                                                                            |
| Early hibernation    | 8/16- 10/24           | 7 $\pm$ 2                                                      | 24D                                                                                        |
| Late hibernation     | 3/14 - 3/27           | 171 $\pm$ 12                                                   | 24D                                                                                        |
| 3d post-hibernation  | 2/3- 4/8              | 161 $\pm$ 23                                                   | 24D                                                                                        |
| 8d post-hibernation  | 3/28- 4/21            | 182 $\pm$ 22                                                   | 24D until 3 days post-hibernation, transferred to 16L:8D for final 5 days before sampling. |

**Table S5:** Primers for qRT-PCR in arctic ground squirrel gonadal tissue. Six reference genes were evaluated for expression stability (i.e. no differences across timepoints and Ct standard deviation below one). When more than three met these criteria for a tissue, the R package *ctrlGene* and *geNorm* algorithm were used to identify the three most stably expressed genes. For tissues with two or more stable reference genes, the geometric mean was used as a reference. For the cross-sectional study, *B2M* was used as a reference gene for testes whereas *YWHAZ* and *HPRT* were used for ovaries. For the mid-winter warming experiment, *ACTB*, *PPIA*, and *HPRT* were used.

| Gene Symbol              | Protein                                        | Direction | Sequence                 | Product Length |
|--------------------------|------------------------------------------------|-----------|--------------------------|----------------|
| <i>Reference Genes</i>   |                                                |           |                          |                |
| B2M                      | beta-2-microglobulin                           | Forward   | GCAGTCGGACCTCTCTTTCA     | 146            |
|                          |                                                | Reverse   | TGTCTCGGTCCCACTTCACT     |                |
| ACTB                     | Actin, cytoplasmic like 1                      | Forward   | GCCTGCGTTCTGTTCTTTTT     | 149            |
|                          |                                                | Reverse   | TACATGGCCGGTGTGTTGAA     |                |
| HPRT                     | hypoxanthine phosphoribosyltransferase 1       | Forward   | CTTGCTGGTGAAGAAGAACCTCTA | 98             |
|                          |                                                | Reverse   | AGTCAAGGGCATATCCAACAAC   |                |
| PPIA                     | peptidylprolyl isomerase A                     | Forward   | AGGCCCTGGCATTGTTGTCTA    | 97             |
|                          |                                                | Reverse   | CTTGCCATCCAACCACTCAG     |                |
| RSP3                     | ribosomal protein S3                           | Forward   | CGAGTTACACCAACCAGGACA    | 124            |
|                          |                                                | Reverse   | CAGGGAAGCCAAACCTCCTCT    |                |
| YWHAZ                    | protein kinase C inhibitor protein             | Forward   | GGGCTAAGTTATACCCAAAGC    | 147            |
|                          |                                                | Reverse   | AGAAAACATTGTCCTGCTC      |                |
| <i>Genes of Interest</i> |                                                |           |                          |                |
| CYP11A                   | cytochrome P450 side chain cleavage            | Forward   | AGACACTGAGACTCCACCC      | 183            |
|                          |                                                | Reverse   | CATTGTCCAGCCATCGGTTT     |                |
| ER $\beta$               | estrogen receptor 2/<br>estrogen receptor beta | Forward   | ATGGAGTCTGGTCGTGTGAA     | 90             |
|                          |                                                | Reverse   | ACTGATTCGTAGCTGGGCAA     |                |
| FSHR                     | follicle stimulating hormone receptor          | Forward   | TTTGCAAACCTGGAGACGGC     | 105            |
|                          |                                                | Reverse   | GACTCTCTGACCCCTAGCCT     |                |
| NGF                      | nerve growth factor                            | Forward   | GGCCCAATAACAGCTTTTCCA    | 120            |
|                          |                                                | Reverse   | CTGCCTGTATGCCGATCAAAA    |                |
| NGF                      | nerve growth factor receptor                   | Forward   | CCAGACTGTGTGAACCCT       | 178            |
|                          |                                                | Reverse   | GGTGATCTCGTCCTGGTAGT     |                |
| STAR                     | steroidogenic acute regulatory protein         | Forward   | AACCCAGCAGGCAAATGGAG     | 131            |
|                          |                                                | Reverse   | CCTCCATGCGTTCCACAAGT     |                |

**Table S6:** Reaction efficiencies for qRT-PCR of arctic ground squirrel testicular and ovarian tissue.

| <b>Target</b>            | <b>Efficiency in Testes</b> | <b>Efficiency in Ovaries</b> |
|--------------------------|-----------------------------|------------------------------|
| <i>Reference Genes</i>   |                             |                              |
| B2M                      | 105%                        | 109%                         |
| ACTB                     | 107%                        | Not run                      |
| HPRT                     | 105%                        | 108%                         |
| PPIA                     | 101%                        | Not run                      |
| RSP3                     | 105%                        | 110%                         |
| YWHAZ                    | 106%                        | 112%                         |
| <i>Genes of Interest</i> |                             |                              |
| CYP11A                   | 107%                        | 107%                         |
| ER $\beta$               | NA                          | 112%                         |
| FSHR                     | 111%                        | 116%                         |
| NGF                      | 112%                        | 117%                         |
| NGFR                     | 103%                        | 104%                         |
| STAR                     | 114%                        | 115%                         |
